# Supplementary material for: Acute renal failure – definition, outcome measures, animal models, fluid therapy and information technology needs: the Second International Consensus Conference of the Acute Dialysis Quality Initiative (ADQI) Group
Source: Springer Nature journal article supplement (doi:10.1186/cc2872), 2004-05-22
Supplement: 13054_2004_2871_MOESM1_ESM.pdf [file 13054_2004_2871_MOESM1_ESM.pdf]

## **Appendix 1**

### **Members of the ADQI Workgroup**

- Rinaldo Bellomo, MD (Department of Intensive Care, Austin & Repatriation Hospital, Melbourne, Australia)
- Joseph V Bonventre, MD, PhD (Harvard-MIT Division of Health Sciences and Technology and Renal Division, Brigham and Women's Hospital, Harvard Medical School, Boston, MA, USA)
- Catherine Bouman, MD (Department of Intensive Care Academic Medical Center, Amsterdam, The Netherlands)
- William Clark, MD (NxStage Medical Inc. and Department of Medicine, Indiana University)
- Samuel N Heyman, MD (Department of Medicine, Hadassah Hospital, Mt. Scopus and the Hebrew University Medical School, Jerusalem, Israel)
- John A Kellum, MD (The CRISMA Laboratory, Department of Critical Care Medicine, University of Pittsburgh School of Medicine, Pittsburgh, PA, USA)
- Norbert Lameire, MD (Renal Division, University Hospital, Ghent, Belgium)
- Jean-Roger Le Gall, MD (Intensive Care Unit, Hôpital Saint-Louis, Paris, France)
- Nathan Levin, MD (Renal Research Institute, New York, USA)
- Wilfred Lieberthal, MD (Amgen Co., Clinical Development and Department of Medicine, Boston University Medical School, Boston, MA, USA)
- Gerhard Marquardt, MD (Edwards Lifesciences S.A., Au Glapin, Switzerland)
- Ravindra L Mehta, MD (Division of Nephrology, University of California–San Diego Medical Center, San Diego, CA, USA)
- Philipp GH Metnitz, MD (Department of Anesthesiology and General Intensive Care, University Hospital, Vienna, Austria)
- Dinis Dos Reis Miranda, MD (University Hospital Groningen, Groningen, The Netherlands)
- Patrick T Murray, MD (Section of Nephrology, University of Chicago, Chicago, IL, USA)
- Paul M Palevsky, MD (Renal Section, Veterans Affairs Pittsburgh Healthcare System, Pittsburgh, PA, USA)
- Francesco Paolini (Biomedical Engineer Research and Development Manager, Monitoring Division – Gambro, Medolla, Italy)
- Pasquale Piccinni, MD (Departments of Intensive Care and Nephrology, St. Bortolo Hospital, Vicenza, Italy)
- Michael R Pinsky, MD (Department of Critical Care Medicine, University of Pittsburgh, Pittsburgh, PA, USA)
- Peter Rogiers, MD (Department of Medical Intensive Care, Middelheim General Hospital, Antwerp, Belgium)
- Claudio Ronco, MD (Department of Nephrology, St. Bortolo Hospital, Vicenza, Italy)
- Brendon Savage, PhD (Department of Medicine University of California, San Diego, CA, USA)
- Miet Schetz, MD, PhD (Department of Intensive Care, University of Leuven, Leuven, Belgium)
- Christian Schlaeper, MD (Fresenius Medical Care, Walnut Creek, CA, USA)
- Ciro Tetta, MD (Fresenius Medical Care MDF S.A., Manno Branch, Manno, Switzerland)

- Christophe Vinsonneau, MD (Service de Reanimation Polyvalente, Cochin Hospital, Paris, France)

Consultants:

- Eric A Hoste, MD (Intensive Care Unit, Ghent University Hospital, Ghent, Belgium)
- Martine Leblanc, MD (Nephrology Center. Maisonneuve-Rosemont Hospital, University of Montreal, Montreal, Canada)
- Raúl Lombardi, MD (Department of Critical Care Medicine, IMPASA, Montevideo, Uruguay)
- G Daniel Martich, MD (Department of Critical Care Medicine, University of Pittsburgh, Pittsburgh, PA, USA)
- Seymour Rosen, MD (Department of Pathology, Harvard Medical School, Boston, MA, USA)
- Andrew Shaw, MD (Department of Critical Care Medicine, University of Texas MD Anderson Cancer Center, Houston, TX, USA)
- Peter Skippen, MD (Pediatric ICU, Children's Hospital, Vancouver, Canada)

Carl Waldmawn, MD (Department of Intensive Care, Royal Berkshire Hospital, Reading, UK)
